# Supplementary material for: Fine-tuning of the inner sidechain of donor polymers for efficient indoor organic photovoltaics
Source: Royal Society of Chemistry journal article supplement (doi:10.1039/d3ta00293d), 2023-01-01
Supplement: d3ta00293d1.pdf [file d3ta00293d1.pdf]

## Supporting Information

### **Fine-tuning of Inner Sidechain of Donor Polymer for Efficient Indoor Organic Photovoltaics**

Sang Hyeon Kim,<sup>a</sup> Cheng Sun,<sup>b</sup> Muhammad Ahsan Saeed,<sup>a</sup> Hyeok-Jin Kwon,<sup>c</sup> Tae Hyuk Kim,<sup>a</sup> Soon-Ki Kwon,<sup>d</sup> Yun-Hi Kim<sup>\*b</sup> and Jae Won Shim<sup>\*a</sup>

<sup>a</sup>School of Electrical Engineering, Korea University, Seoul 02841, Republic of Korea

<sup>b</sup>Department of Chemistry & RINS, Gyeongsang National University, Jinju 52828, Republic of Korea

<sup>c</sup>Department of Chemical Engineering, Pohang University of Science and Technology, Pohang 37673, Republic of Korea

<sup>d</sup>Department of Materials Engineering and Convergence Technology and ERI, Gyeongsang National University, Jinju 52828, Republic of Korea

Corresponding authors: [ykim@gnu.ac.kr](mailto:ykim@gnu.ac.kr) (Y.H. Kim) [jwshim19@korea.ac.kr](mailto:jwshim19@korea.ac.kr) (J.W. Shim)

## Materials

All solvents and reagents were purchased from Sigma-Aldrich. All other materials were of a common commercial level and were used as received. All solvents used were purified prior to use. BDD and PBDB-EH-3Cl was synthesized following the previous literature.<sup>[S0]</sup>

## Measurements

<sup>1</sup>H-NMR and <sup>13</sup>C-NMR were recorded with a Bruker DRX-300 and Avance 500 spectrometer, respectively. Mass spectra were recorded on a JEOL JMS-700 spectrometer. Thermal gravimetric analysis (TGA) was performed on a TA TGA 2100 thermogravimetric analyzer under nitrogen atmosphere with a heating rate of 10 °C/min. Differential scanning calorimetry (DSC) was conducted under nitrogen on a TA Instruments 2100 DSC. The sample was heated at 10 °C /min from 30 to 300 °C. The UV-Vis absorption spectra were determined using a Cary 5000 UV-vis-near-IR double beam spectrophotometer. Cyclic voltammetry (CV) was performed using a PowerLab/AD instrument model system in a 0.1 M tetrabutylammonium hexafluorophosphate (Bu<sub>4</sub>NPF<sub>6</sub>) solution in anhydrous acetonitrile as the supporting electrolyte, at a scan rate of 100 mV/s. A glassy carbon electrode was used as the working electrode. A platinum wire was used as the counter electrode, and an Ag/AgCl electrode was used as the reference electrode.

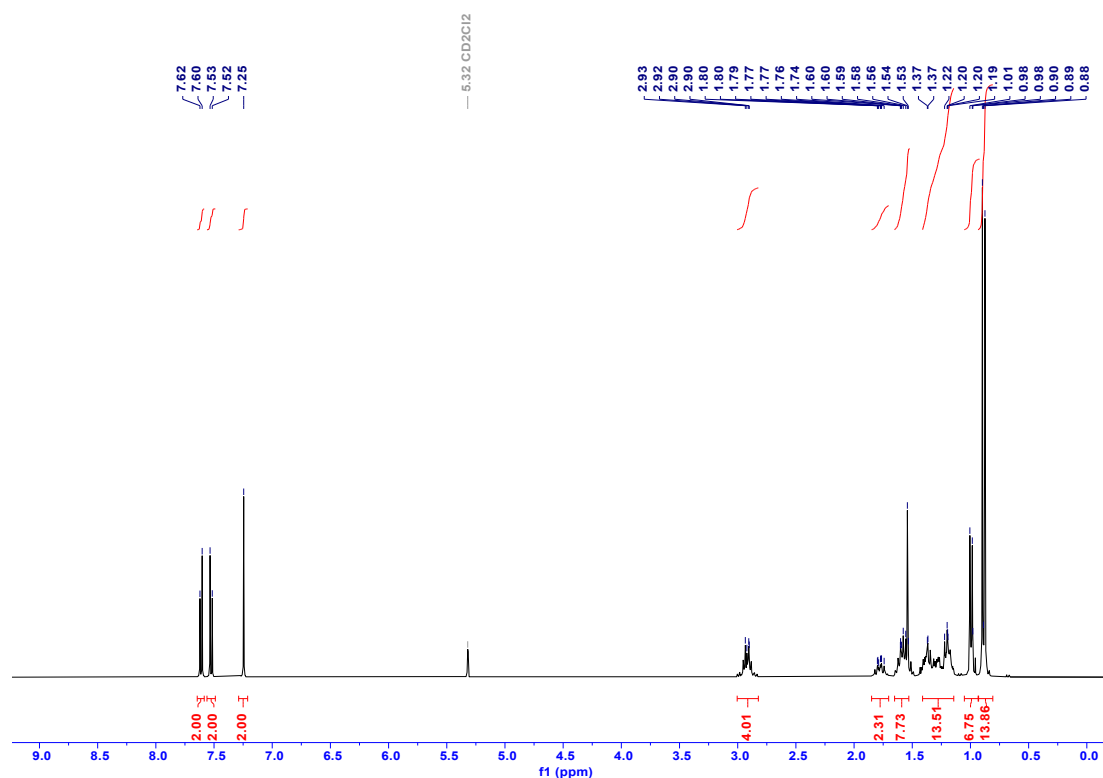

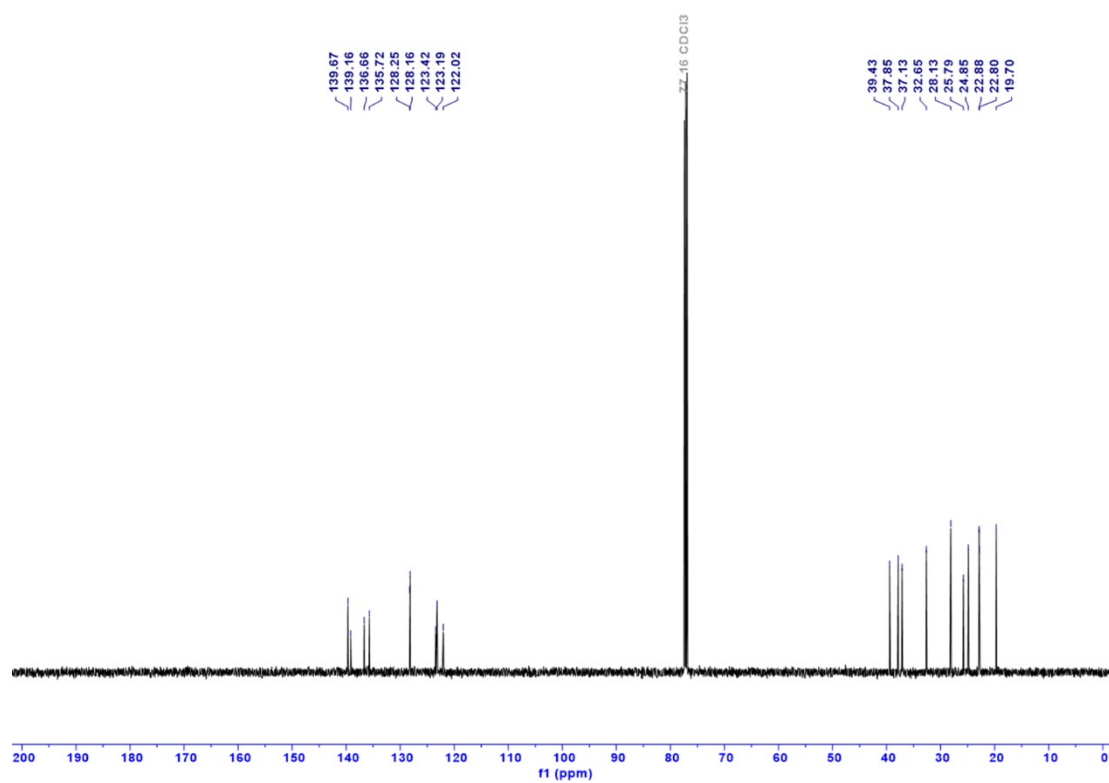

**Figure S1.** <sup>1</sup>H NMR and <sup>13</sup>C NMR spectra of DMO-3-Cl-BDT.

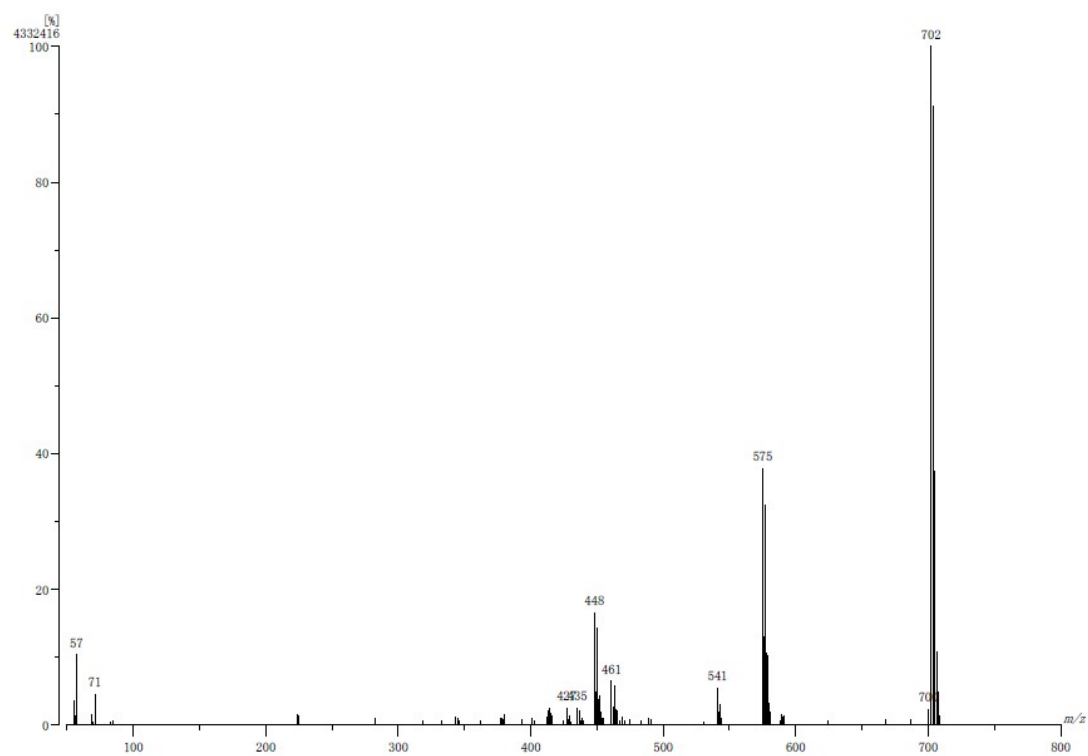

**Figure S2.** HR-mass spectra of DMO-3-Cl-BDT.

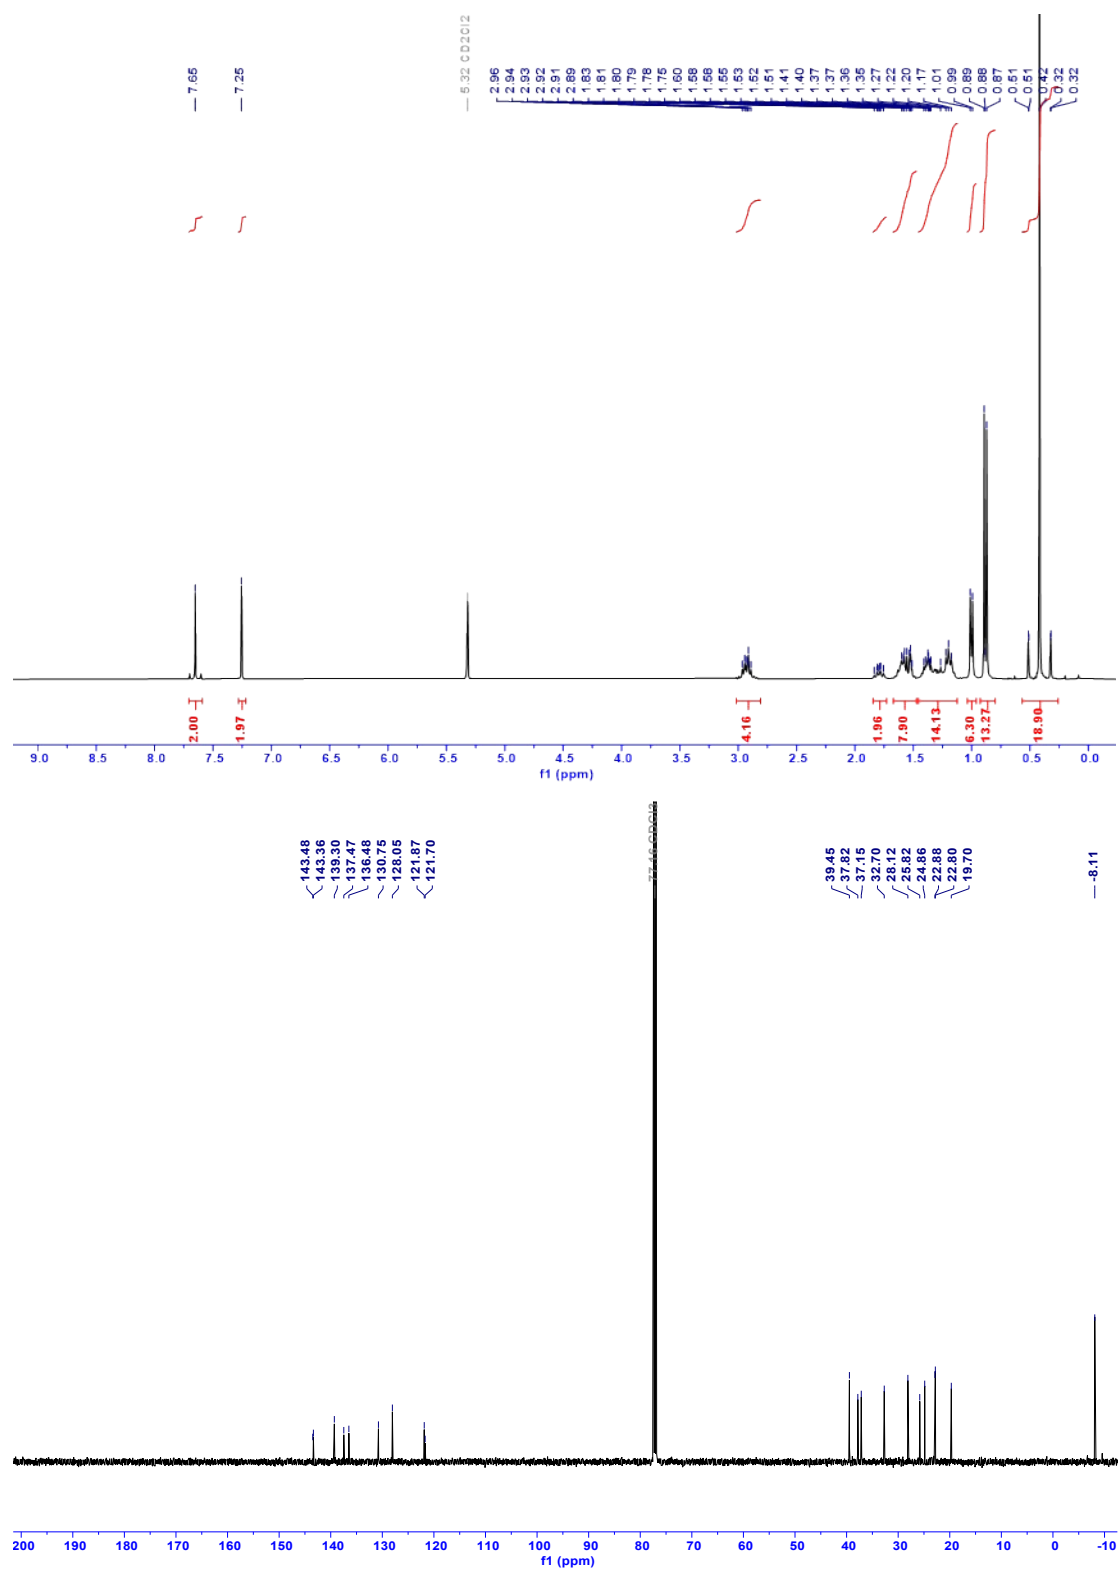

**Figure S3.** <sup>1</sup>H NMR and <sup>13</sup>C NMR spectra of DMO-3Cl-BDT-Sn.

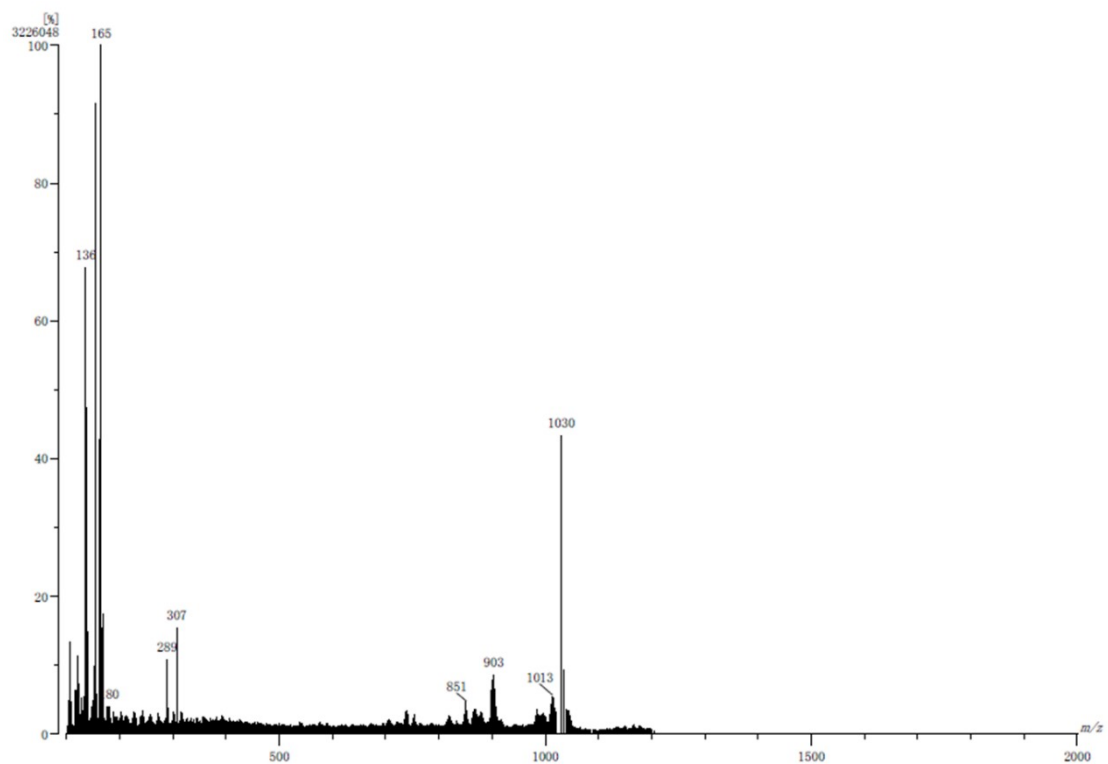

**Figure S4.** HR-mass spectra of DMO-3Cl-BDT-Sn

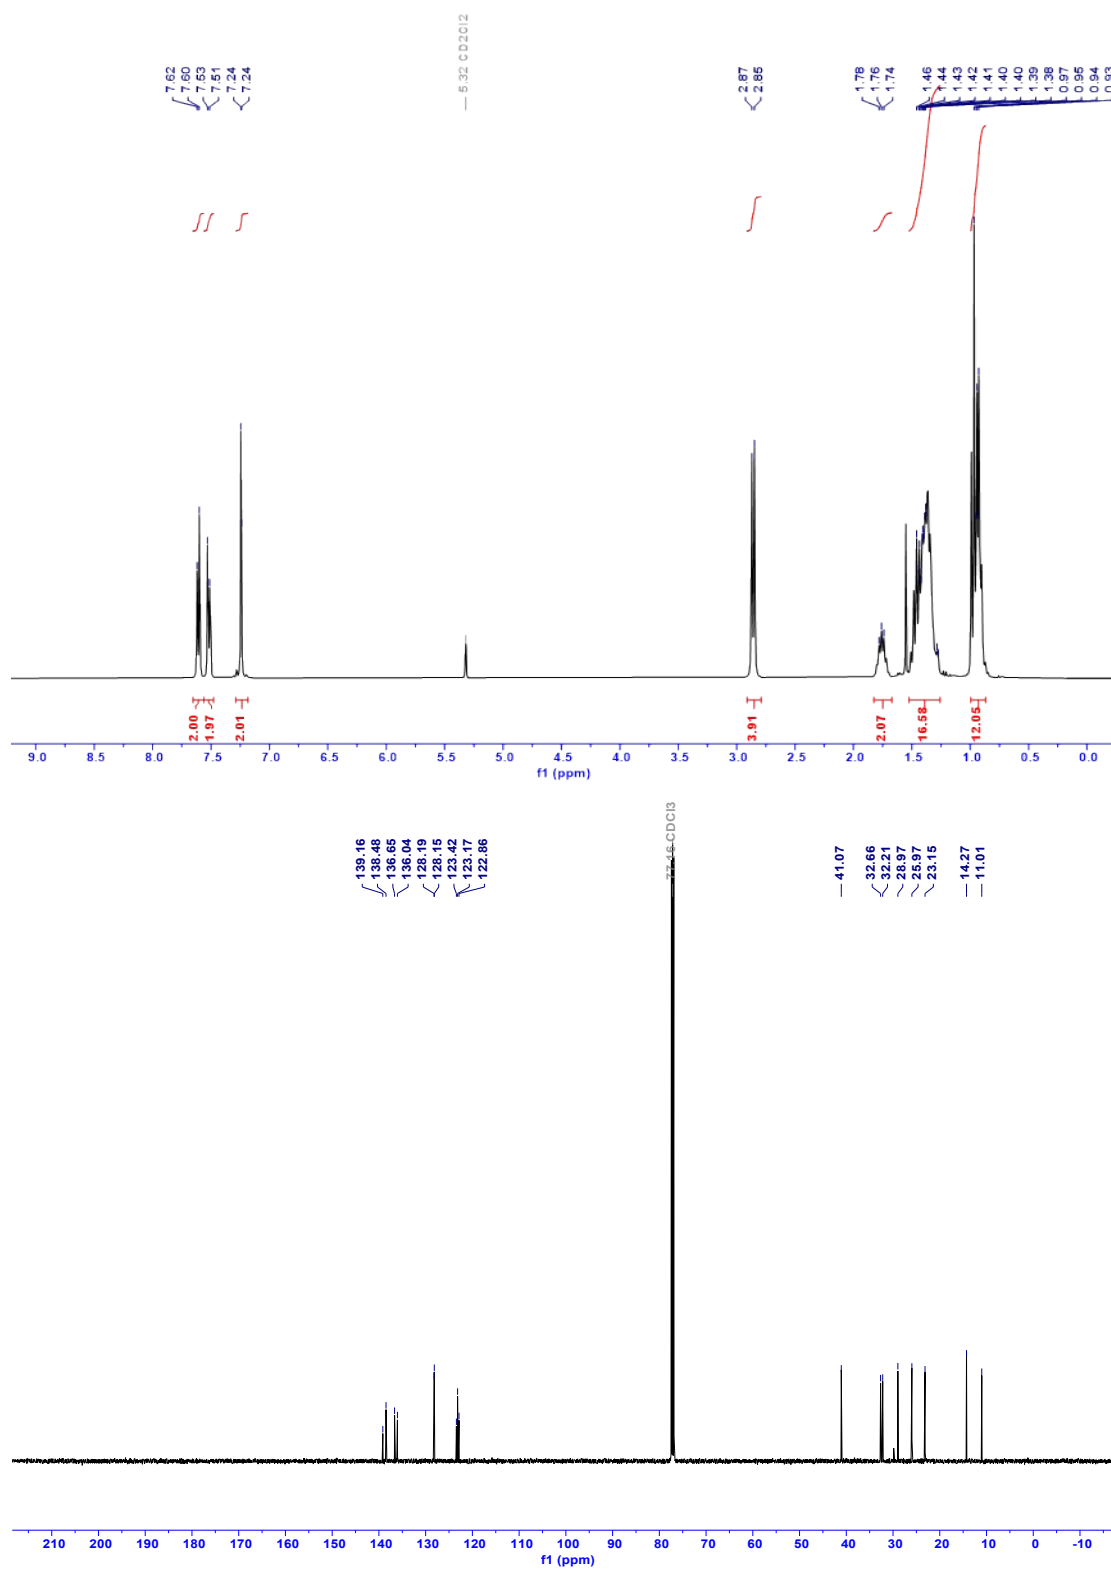

**Figure S5.** <sup>1</sup>H NMR and <sup>13</sup>C NMR spectra of EH-4Cl-BDT.

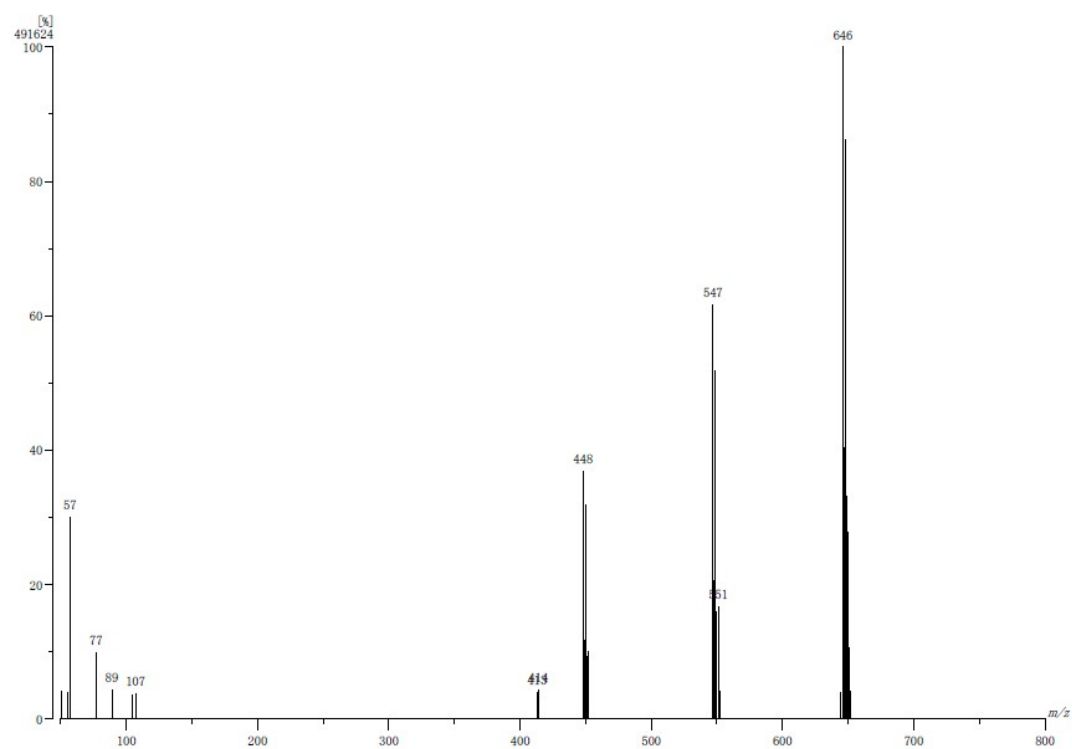

**Figure S6.** HR-mass spectra of EH-4Cl-BDT.

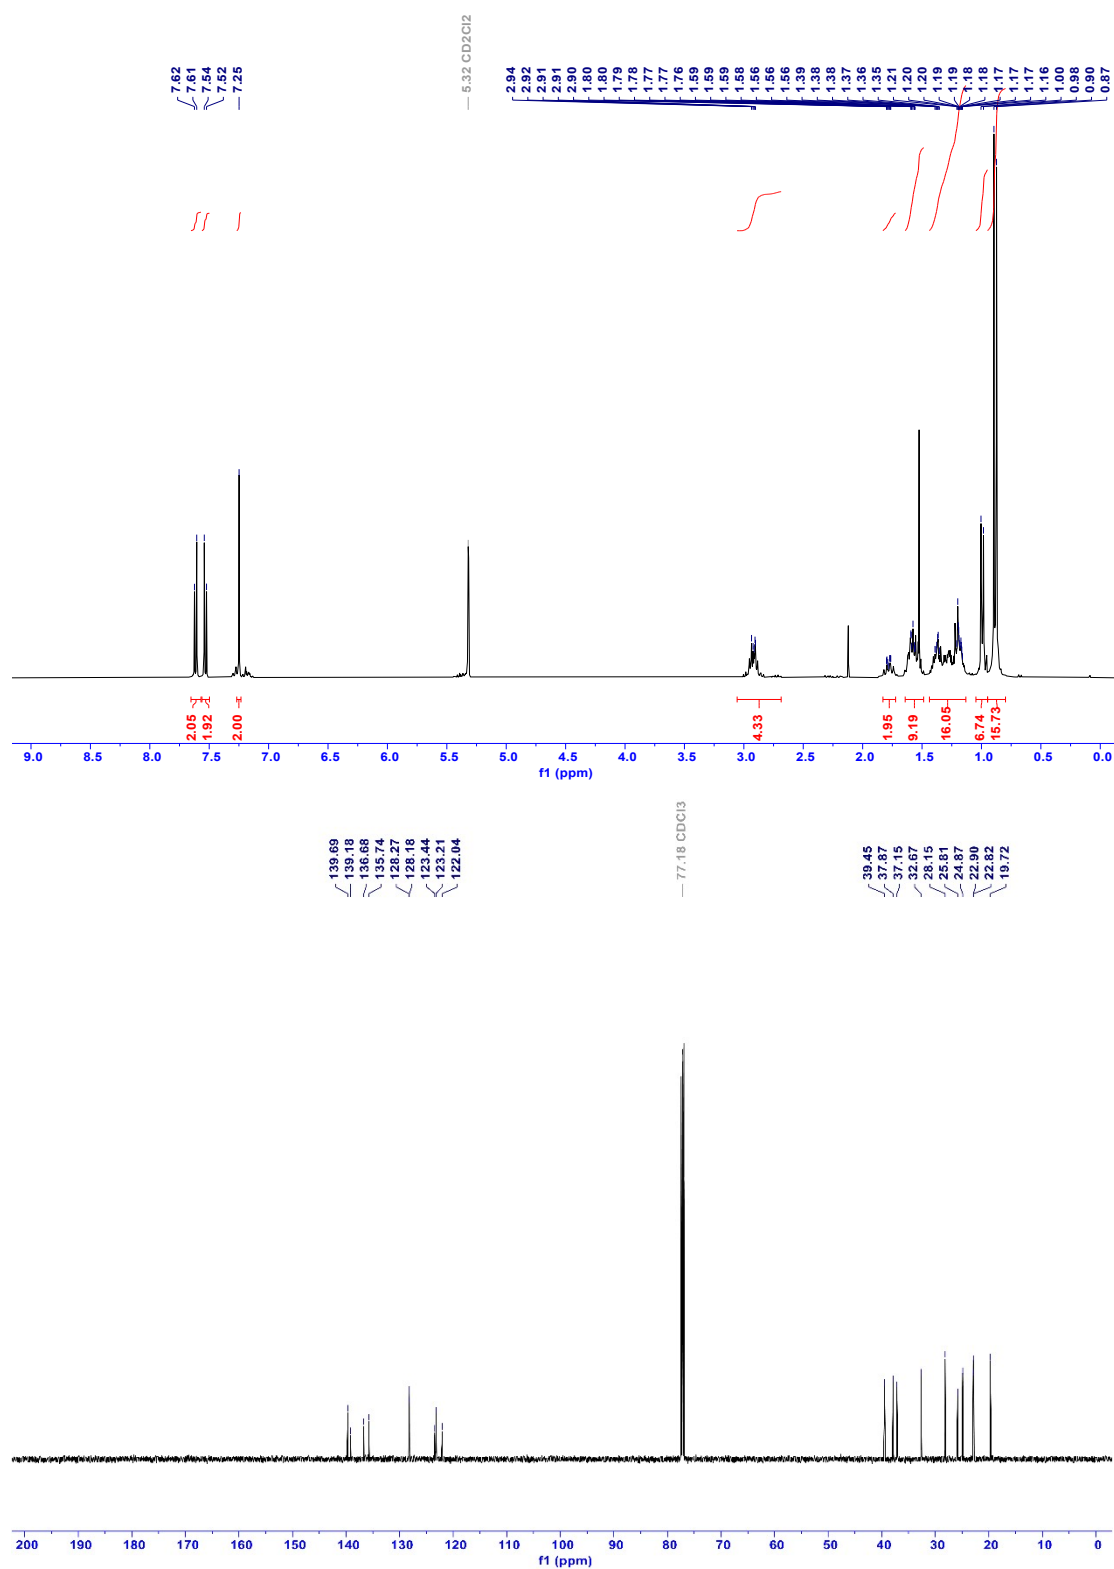

**Figure S7.** <sup>1</sup>H NMR and <sup>13</sup>C NMR spectra of DMO-4Cl-BDT.

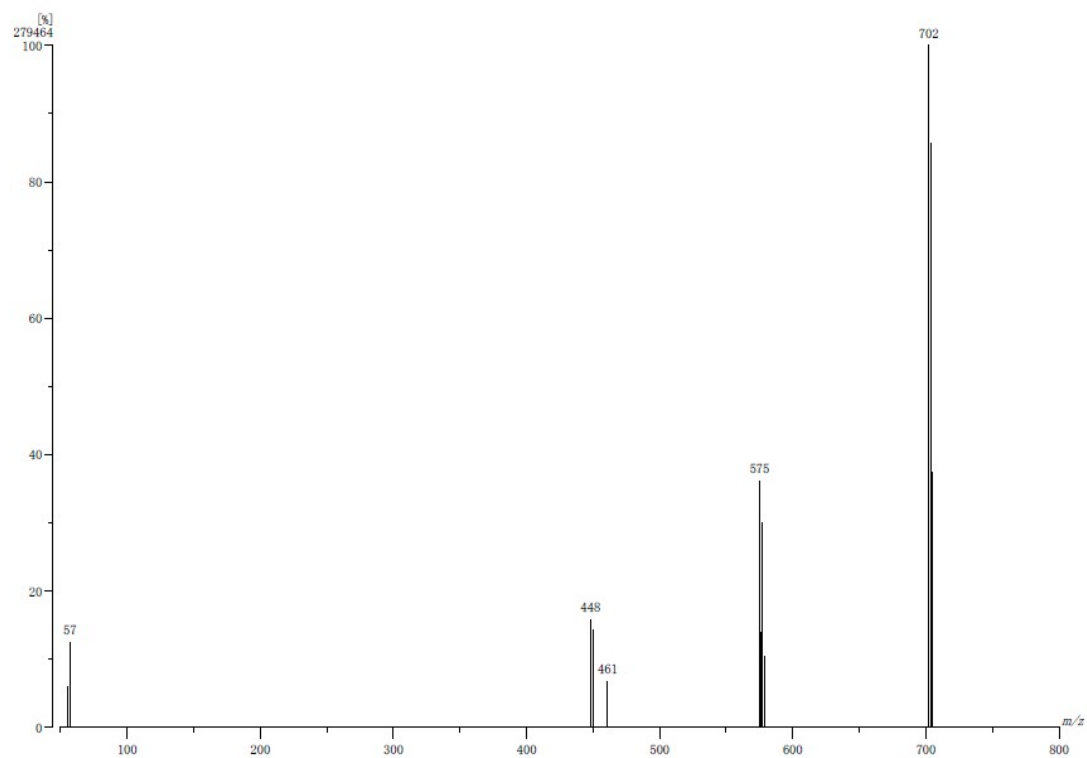

**Figure S8.** HR-mass spectra of DMO-4Cl-BDT.

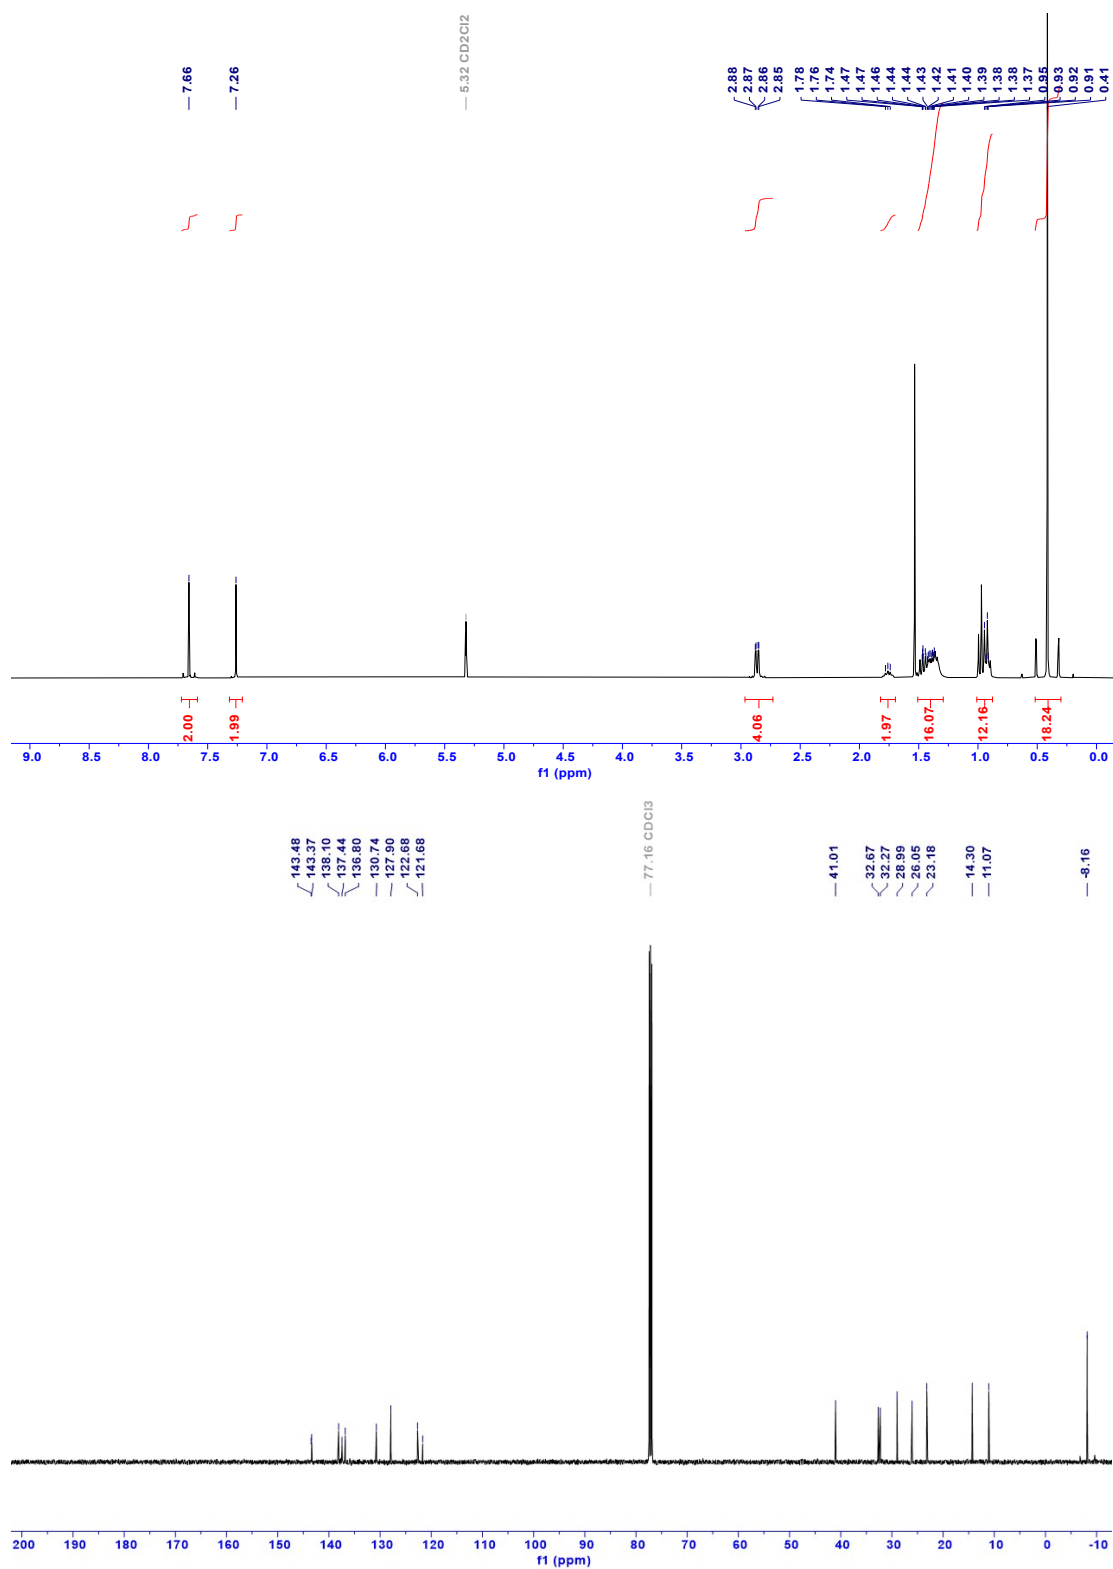

**Figure S9.** <sup>1</sup>H NMR and <sup>13</sup>C NMR spectra of EH-4Cl-BDT-Sn.

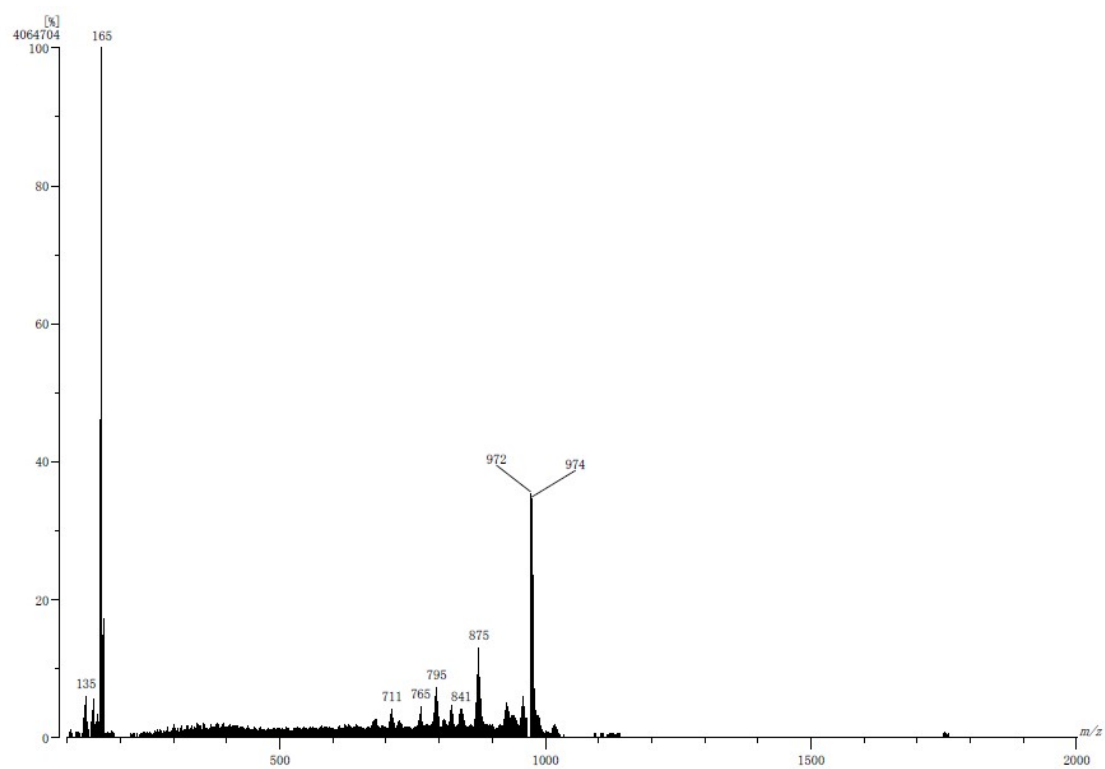

**Figure S10.** HR-mass spectra of EH-4Cl-BDT-Sn.

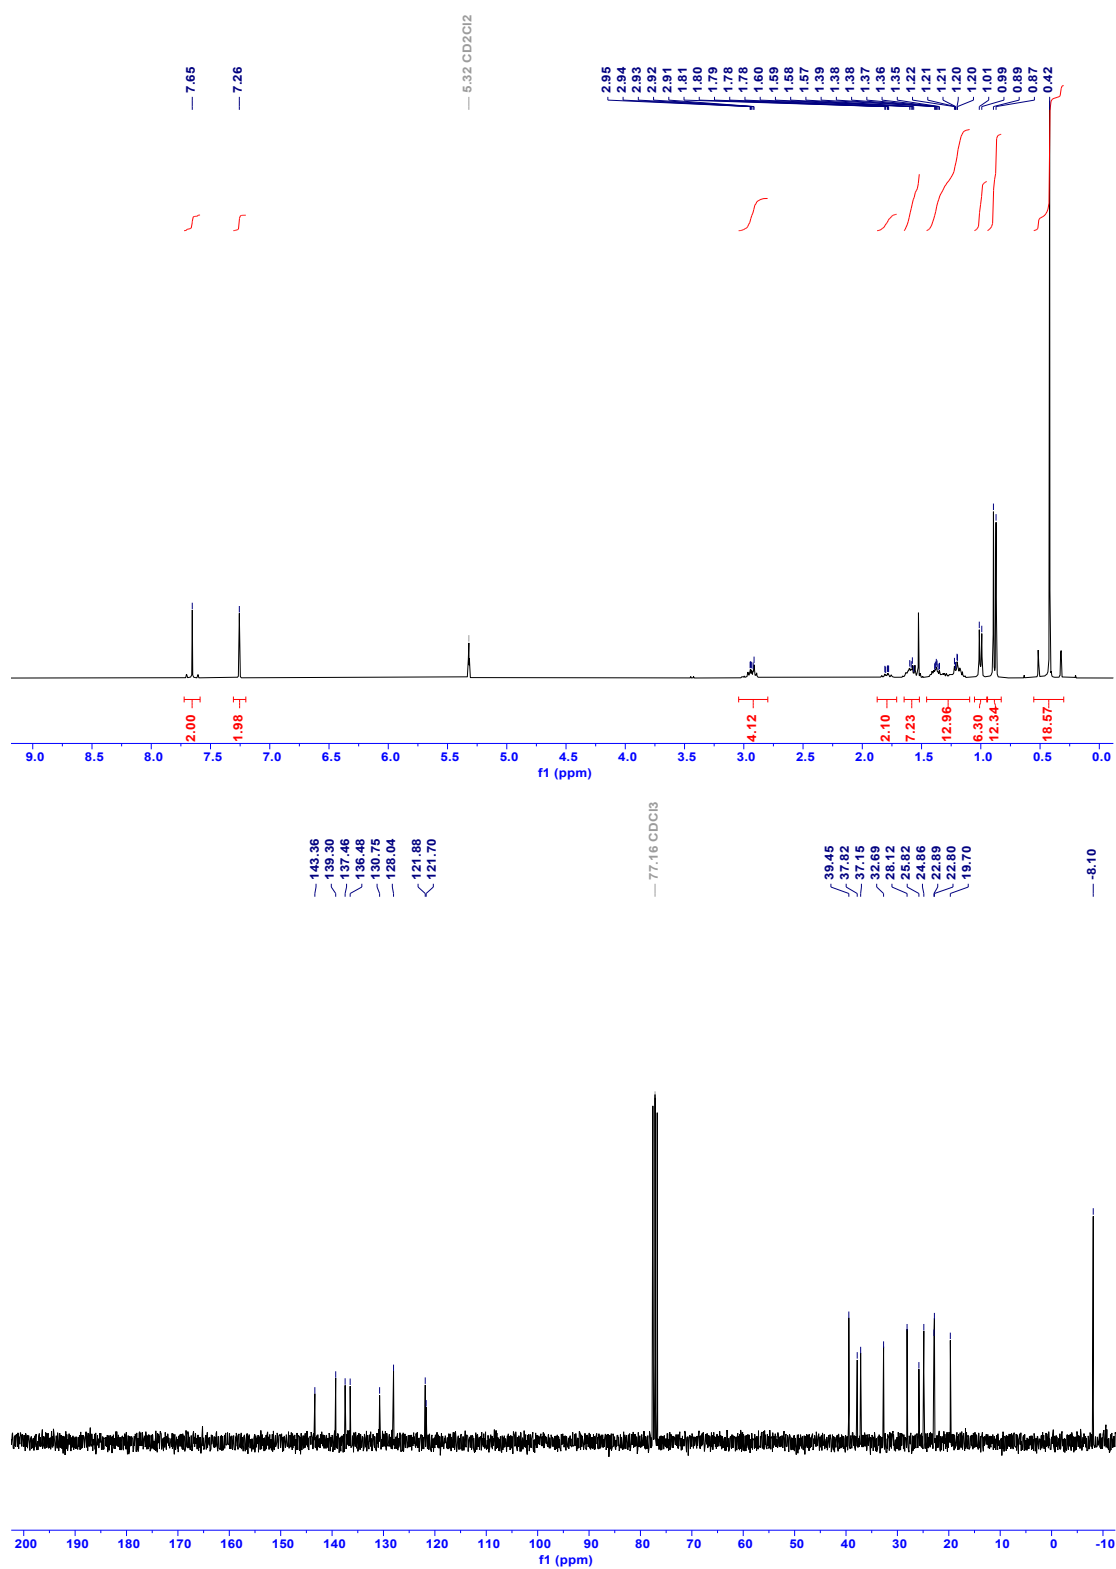

**Figure S11.** <sup>1</sup>H NMR and <sup>13</sup>C NMR spectra of DMO-4Cl-BDT-Sn.

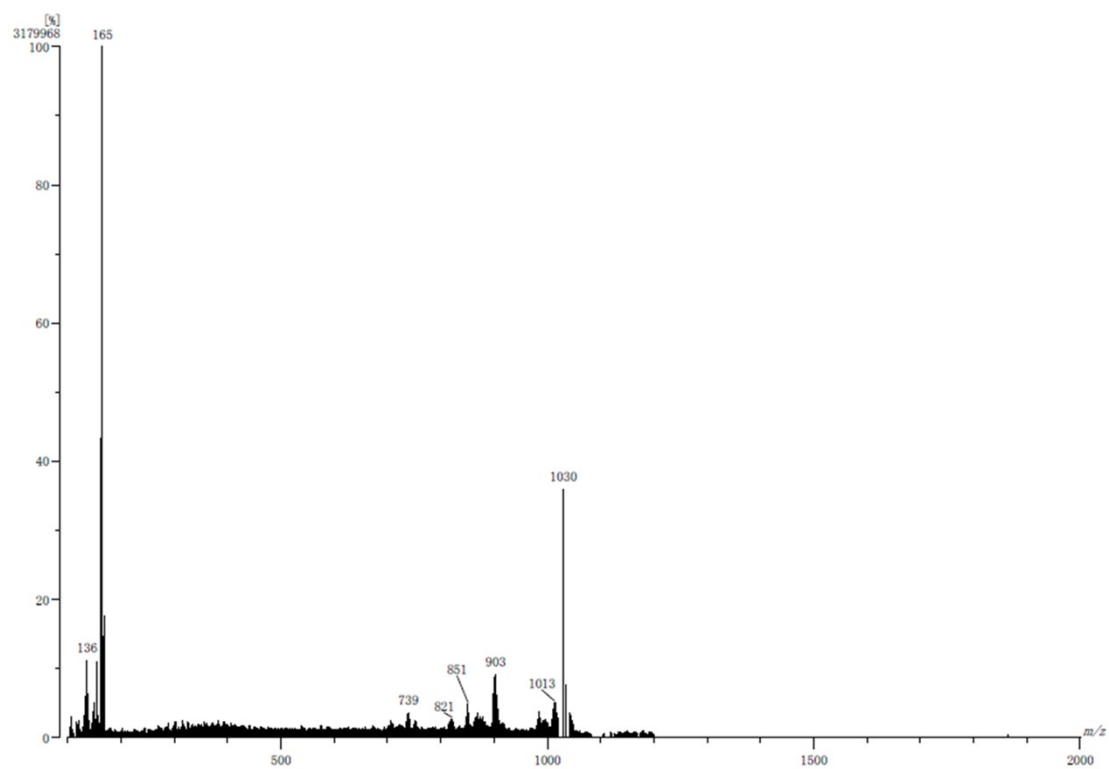

**Figure S12.** HR-mass spectra of DMO-4Cl-BDT-Sn.

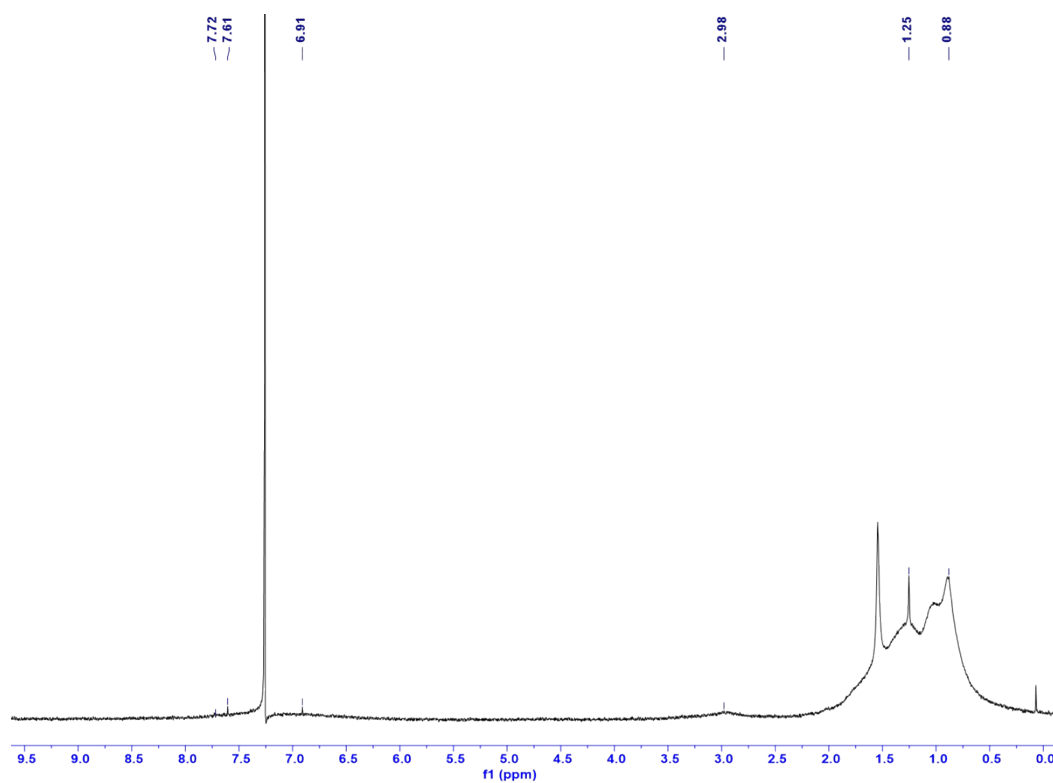

**Figure S13.**  $^1\text{H}$  NMR spectra of PBDB-DMO-3Cl.

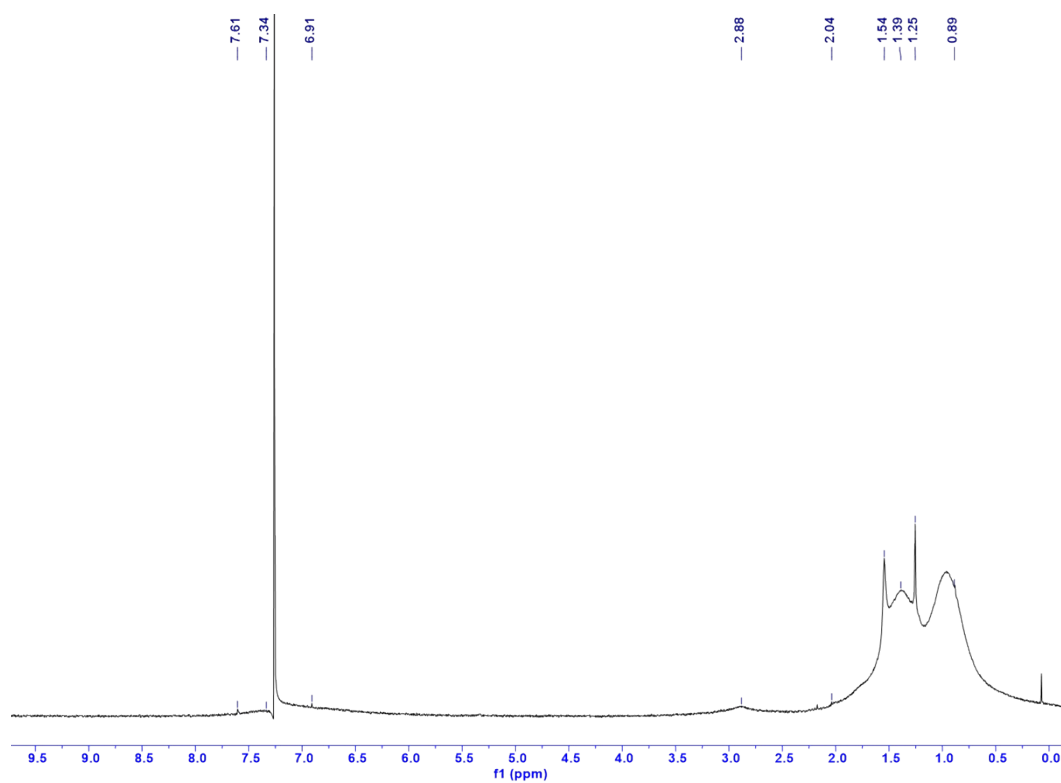

**Figure S14.**  $^1\text{H}$  NMR spectra of PBDB-EH-4Cl.

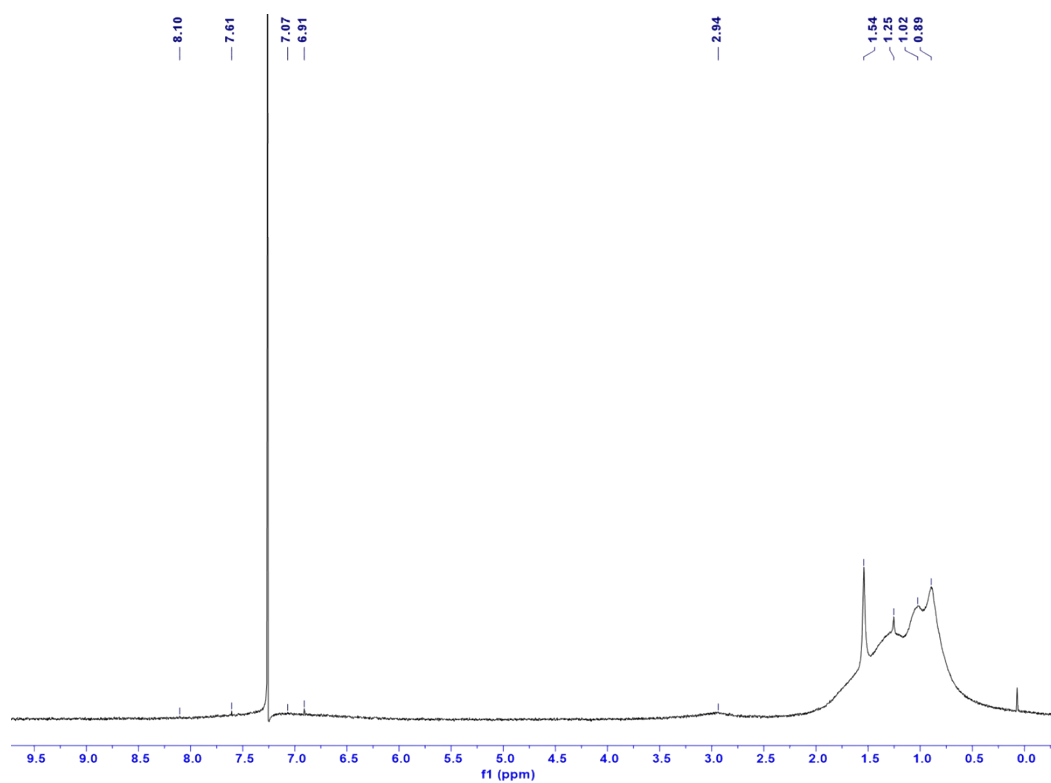

**Figure S15.**  $^1\text{H}$  NMR spectra of PBDB-DMO-4Cl.

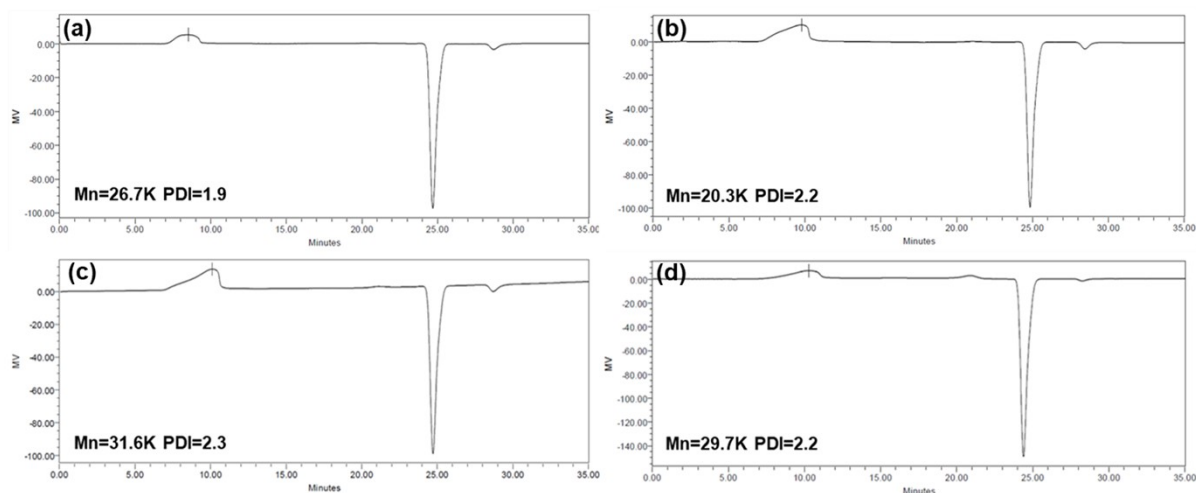

**Figure S16.** GPC curves of PM7 series polymer (a) PBDB-EH-3Cl (b) PBDB-EH-4Cl (c) PBDB-DMO-3Cl (d) PBDB-DMO-4Cl in chloroform.

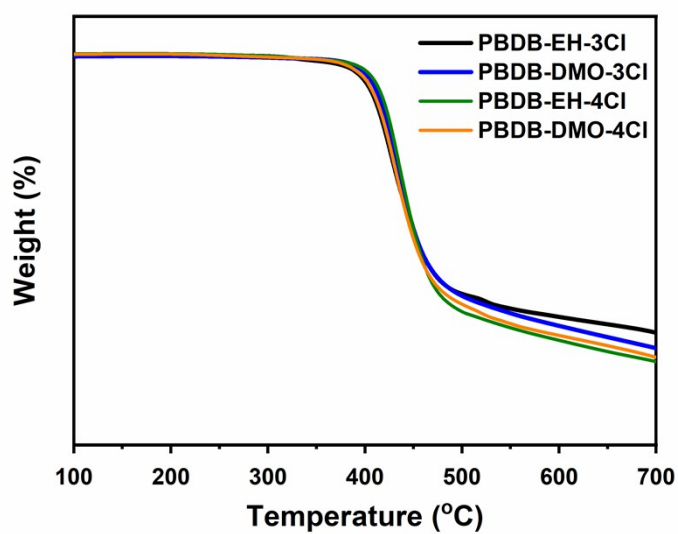

**Figure S17.** TGA plots of PM7 series polymer with a heating rate of 10 °C/min under the N<sub>2</sub> atmosphere

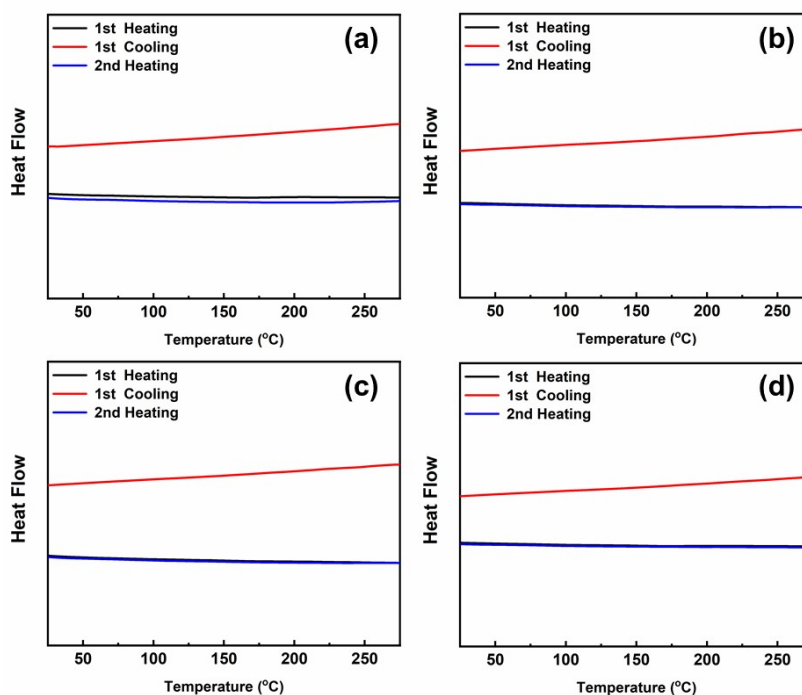

**Figure S18.** DSC plots of PM7 series polymer donor (a) PBDB-EH-3Cl (b) PBDB-DMO-3Cl (c) PBDB-EH-4Cl (d) PBDB-DMO-4Cl under the  $N_2$  atmosphere

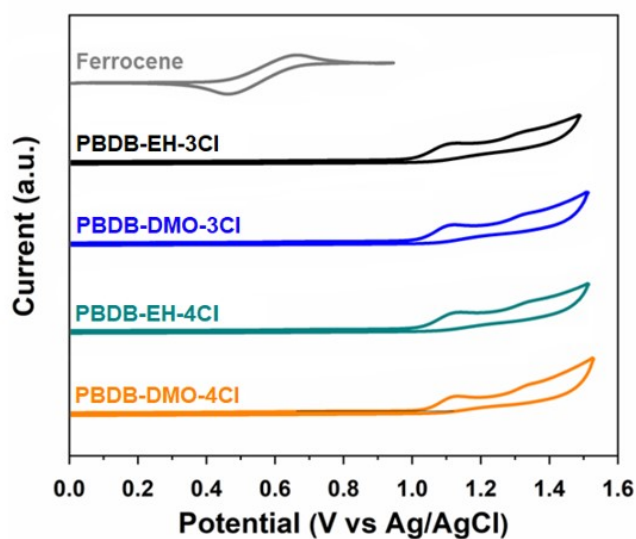

**Figure S19.** Cyclic voltammetry curves of PM7 series polymer donors

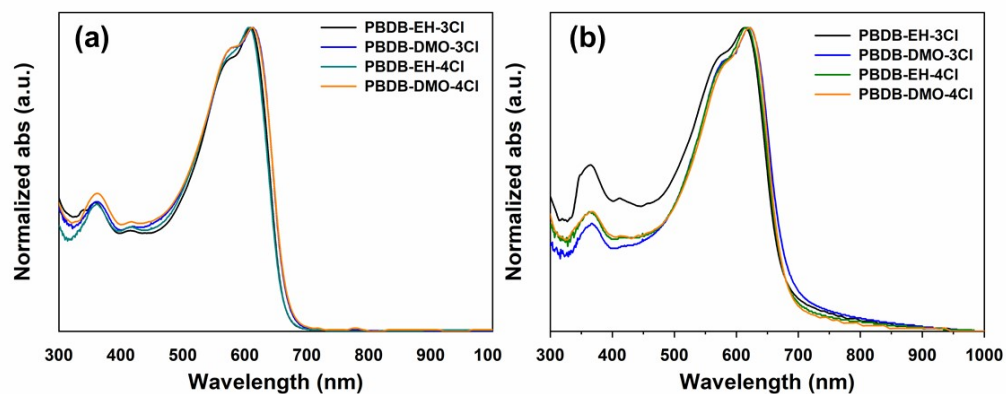

**Figure S20.** UV-vis absorption spectra of PM7 series polymer donor in chloroform (a) and film (b)

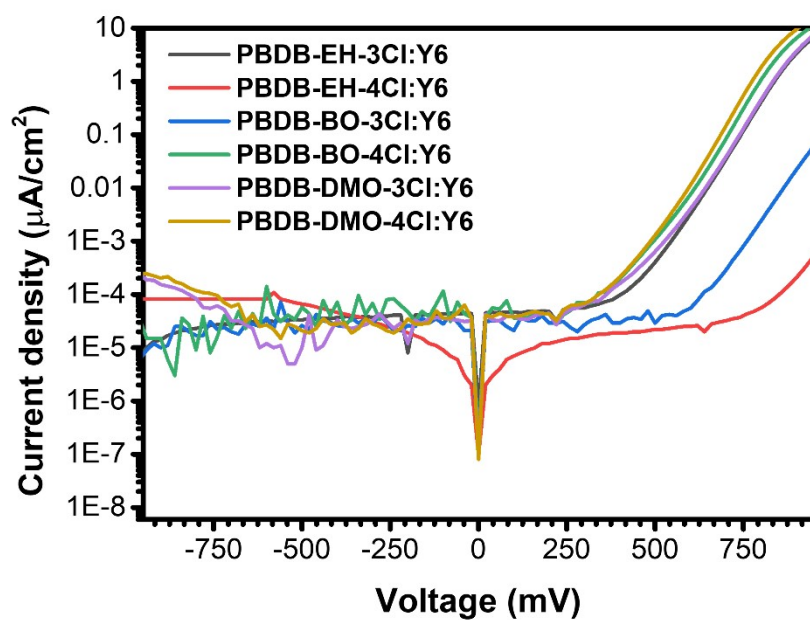

**Figure S21.** Dark curve of PM7 series polymer donor based OPVs

The performance of the OPVs is often described with a single-diode equivalent circuit model, including one current source and two parasitic resistances, a shunt resistance ( $R_p$ ) and a series resistance ( $R_s$ ) under illumination. The  $R_p$  is related to the leakage current, recombination, *etc.*, and the  $R_s$  is originated from the resistive components of the device such as the resistance of electrodes and bulk resistance of photoactive layers.

By using the Shockley **Eq. 1,2**, the circuit model under illumination can be formulated, and the  $J_{SC}$  and the  $V_{OC}$  can be expressed as follows,

$$J_{SC} = -\frac{1}{R_s + \frac{R_p}{1 + \frac{J_{ph}}{J_0} \left( \exp\left(\frac{|J_{SC}| R_s A}{n k T}\right) - 1 \right)}} \quad (1)$$

$$V_{OC} = \frac{kT}{q} \ln \left\{ 1 + \frac{J_{ph}}{J_0} \left( 1 - \frac{V_{OC}}{J_{ph} R_p A} \right) \right\} \approx \frac{kT}{q} \ln \left\{ 1 + \frac{J_{ph}}{J_0} \right\} \quad (2)$$

where  $J_{ph}$  is the photo-current density,  $J_0$  is the reverse saturation current density,  $n$  is the ideality factor,  $q$  is the elementary charge number ( $1.602 \times 10^{-19}$  C),  $k$  is the Boltzmann constant ( $8.617 \times 10^{-5}$  eV/K),  $T$  is temperature, and  $A$  is the area of the photoactive region. Also, when

$R_p \gg R_s$  and  $J_{ph} = J_{SC}$ , Eq. (2) can be written as  $V_{OC} \approx \frac{kT}{q} \ln \left\{ 1 + \frac{J_{ph}}{J_0} \right\}$ , which seems to be independent of  $R_s$  and  $R_p$ . The  $R_s A$  and  $R_p A$  values were extracted from the inverse slope of the  $J$ - $V$  characteristics under illumination in the range of 0.96 – 1.0 V and near 0 V (close to the  $J_{SC}$  point), respectively. The FF ( $J_{max} \times V_{max} / J_{SC} \times V_{OC}$ ) can be shown as a function of the normalized  $V_{OC}$  ( $v_{OC} = eV_{OC} / nkT$ ), normalized  $R_s$  ( $r_s = R_s / R_{CH}$ ), and normalized  $R_p$  ( $r_p = R_p / R_{CH}$ ), where the characteristic resistance ( $R_{CH}$ ) is defined as  $R_{CH} = V_{OC} / (J_{SC} A)$ . The equation for the ideal FF<sub>0</sub> of the OPVs is expressed as follows:

$$FF_0 = \frac{v_{OC} - \ln(v_{OC} + 0.72)}{v_{OC} + 1} \quad (3)$$

where,  $R_s = 0$  and  $R_p = \infty$ . However, owing to the parasitic resistance effects, the real FF value should deviate from the ideal FF<sub>0</sub>, and thus, semi-empirical expressions with the parasitic effects are shown below:

$$FF_s = FF_0 (1 - 1.1 r_s) + 0.19 r_s^2, \quad (0 \leq r_s \leq 0.4, 1/r_p = 0) \quad (4)$$

and,

$$FF_{SP} = FF_s \left\{ 1 - \frac{(v_{OC} + 0.7) FF_s}{v_{OC} r_p} \right\}, \quad (0 \leq r_s + 1/r_p \leq 0.4) \quad (5).$$

$$V_{OC} = \frac{E_{gap}}{q} - \frac{kT}{q} \ln \left\{ \frac{(1 - P_D) \gamma N_C^2}{P_D G} \right\} \quad (6)$$

where  $E_{gap}$  is the energy difference between the HOMO-donor and LUMO-acceptor,  $q$  is the elementary charge,  $k$  is the Boltzmann constant,  $T$  is the temperature in Kelvin,  $P_D$  is the dissociation probability of the electron (e)-hole (h) pairs,  $\gamma$  is the Langevin recombination constant,  $N_C$  is the effective density of states, and  $G$  is the generation rate of bound e-h pairs.

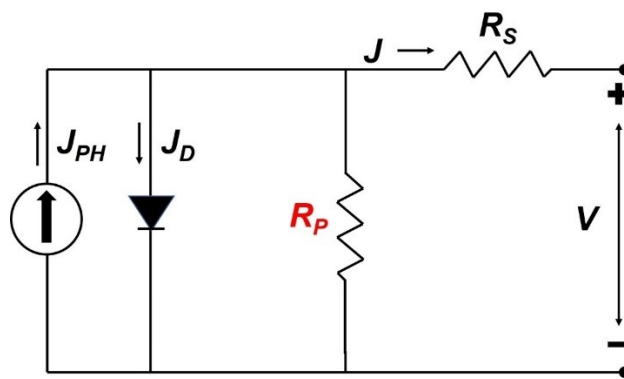

**Fig. S22.** Parasitic resistance effects based on the single-diode equivalent circuit model.

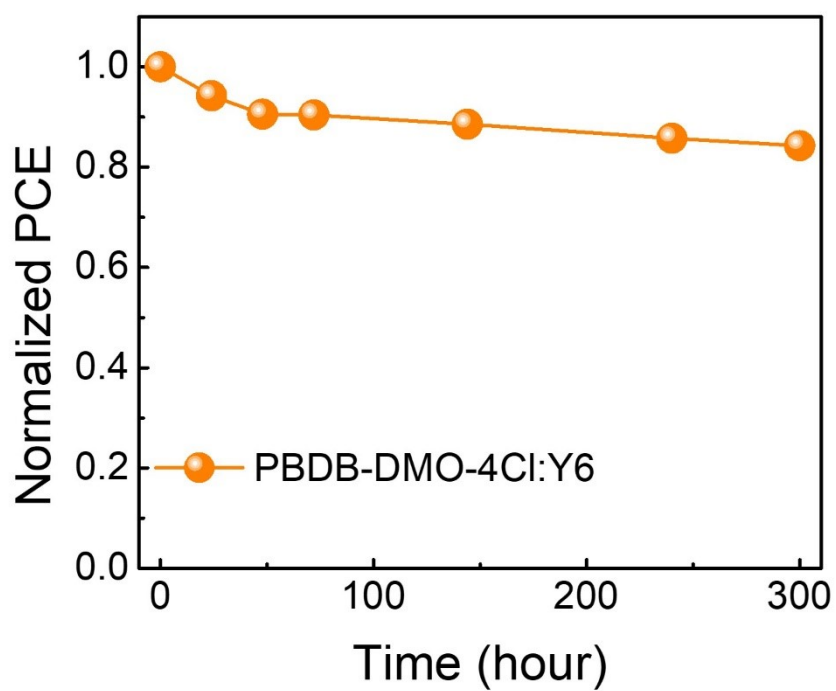

**Figure S23.** Device shlef-lifetime under the LED lighting of PBDB-DMO-4Cl:Y6 based device.

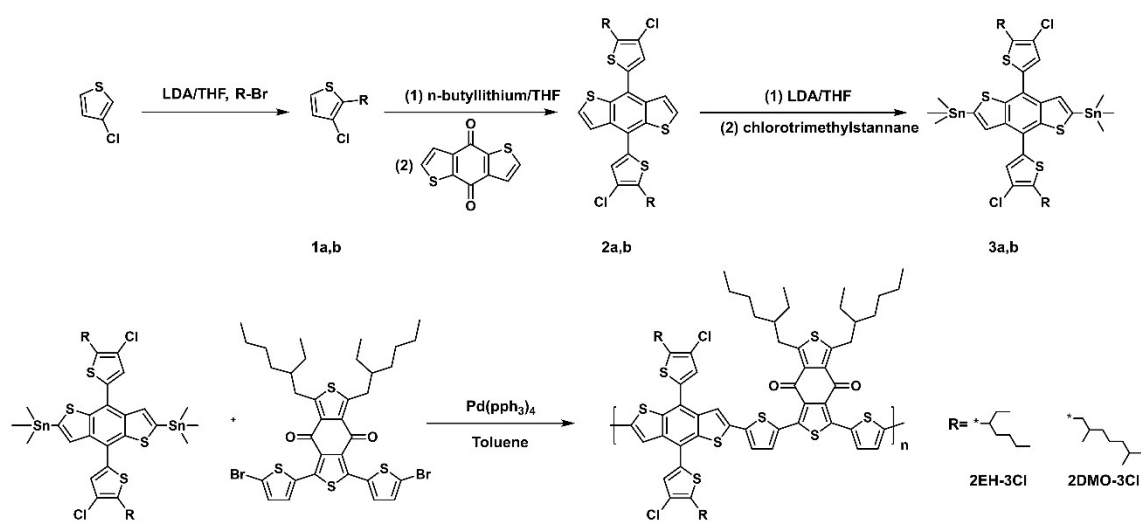

**Scheme S1.** Synthetic scheme for PBDB-EH-3Cl and PBDB-DMO-3Cl.

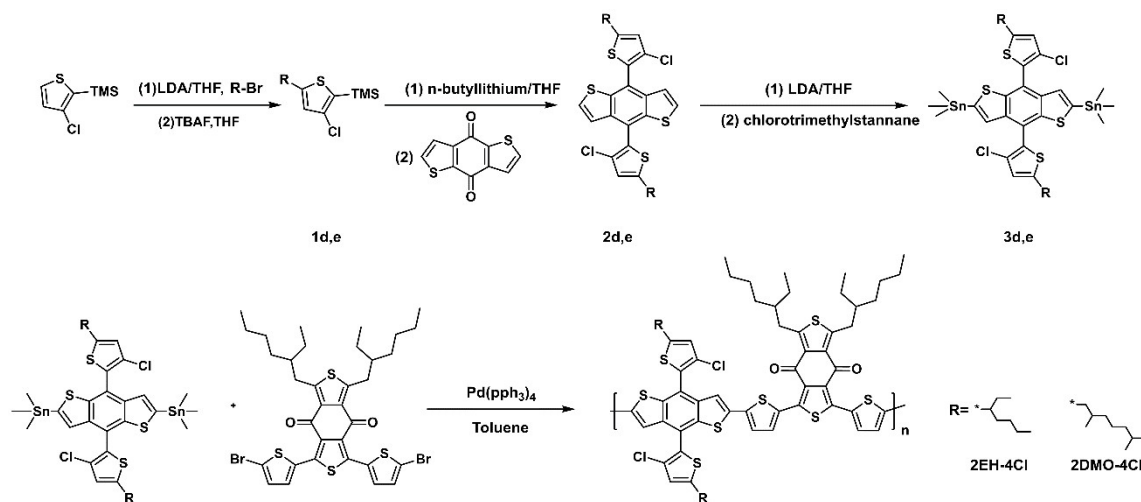

**Scheme S2.** Synthetic scheme for PBDB-EH-4Cl and PBDB-DMO-4Cl.

**Table S1.** List of renewable power sources along with a capacity of harvested power.

| Power sources | Type            | Transducers                           | Typical harvested power density     | Ref |
|---------------|-----------------|---------------------------------------|-------------------------------------|-----|
| Solar         | Electromagnetic | Solar Panels (outdoors) (0-200 k lux) | $\sim 15 \text{ mW/cm}^2$           | S1  |
| Indoor lights | Electromagnetic | Solar Panels (indoors) (1-3 k lux)    | $\sim 15 \text{ }\mu\text{W/cm}^2$  | S2  |
| Thermal       | Thermal         | Thermoelectric generators (TEG)       | $\sim 15 \text{ }\mu\text{W/cm}^2$  | S3  |
| Vibration     | Mechanical      | Piezoelectric generators              | $\sim 330 \text{ }\mu\text{W/cm}^2$ | S4  |
|               |                 | Electrostatic generators              | $\sim 50 \text{ }\mu\text{W/cm}^2$  | S5  |
| RF            | Electromagnetic | Antenna                               | $\sim 12 \text{ nW/cm}^2$           | S6  |

## References

- [S1] M. Hassanalieragh, T. Soyata, A. Nadeau, and G. Sharma, “UR-SolarCap: An open source intelligent auto-wakeup solar energy harvesting system for supercapacitor based energy buffering,” *IEEE Access*, vol. 4, pp. 542–557, Mar. 2016.
- [S2] Y. K. Tan and S. K. Panda, “Energy harvesting from hybrid indoor ambient light and thermal energy sources for enhanced performance of wireless sensor nodes,” *IEEE Trans. Ind. Electron.*, vol. 58, no. 9, pp. 4424–4435, 2011.
- [S3] X. Lu and S.-H. Yang, “Thermal energy harvesting for WSNs,” in *Proc. IEEE Int. Conf. Systems, Man and Cybernetics*, pp. 3045–3052, 2010.
- [S4] D. L. Churchill, M. J. Hamel, C. P. Townsend, and S. W. Arms, “Strain energy harvesting for wireless sensor networks,” *Smart Struct. Mater.*, vol. 5055, pp. 319–327, 2003.
- [S5] S. Boisseau, G. Despesse, and A. Sylvestre, “Optimization of an electret-based energy harvester,” *Smart Mater. Struct.*, vol. 19, no. 7, pp. 075015, 2010.
- [S6] M. Piñuela, P. D. Mitcheson, and S. Lucyszyn, “Ambient RF energy harvesting in urban and semi-urban environments,” *IEEE Trans. Microwave Theory Tech.*, vol. 61, no. 7, pp. 2715–2726, July 2013.

**Table S2.** UV-vis data and energy level for PM7 series polymer

| Donor        | <i>Mn</i> (pdi)<br>[kDa] | $\lambda_{max}^{sol}$<br>[nm] <sup>(a)</sup> | $\lambda_{max}^{film}$<br>[nm] <sup>(b)</sup> | $E_g^{opt}$<br>[eV] <sup>(c)</sup> | HOMO<br>[eV] <sup>(d)</sup> | $\lambda_{max}^{sol}$<br>[eV] <sup>(d)</sup> |
|--------------|--------------------------|----------------------------------------------|-----------------------------------------------|------------------------------------|-----------------------------|----------------------------------------------|
| PBDB-EH-3CI  | 26 (1.9)                 | 609                                          | 614                                           | 1.82                               | -5.33                       | -3.51                                        |
| PBDB-EH-4CI  | 20 (2.2)                 | 607                                          | 615                                           | 1.82                               | -5.34                       | -3.52                                        |
| PBDB-DMO-3CI | 32 (2.3)                 | 607                                          | 612                                           | 1.82                               | -5.35                       | -3.53                                        |
| PBDB-DMO-4CI | 30 (2.2)                 | 612                                          | 621                                           | 1.83                               | -5.36                       | -3.53                                        |

<sup>a</sup> $\lambda_{max}$  values of corresponding chloroform solutions. <sup>b</sup> $\lambda_{max}$  values of corresponding thin-films spin-coated from chloroform solutions. <sup>c</sup>Optical bandgaps calculated from the absorption onsets. <sup>d</sup>absorption coefficients at the  $\lambda_{max}$ s estimated from film absorption spectra. <sup>d</sup>HOMO energy levels were estimated from cyclic voltammetry:  $E_{HOMO}$  (eV) =  $-(E_{onset}^{ox} - E_{onset}^{Fc/Fc^+}) + E_{HOMO}^{Fc}$ ;  $E_{onset}^{Fc/Fc^+} = 0.46$  eV,  $E_{HOMO}^{Fc} = -4.8$  eV,  $E_{LUMO}(eV) = E_{HOMO}(eV) - E_g^{opt}(eV)$ .

**Table S3.** Summary of recently reported photovoltaic performance under halogen lamp 1000 lx illumination.

| Photoactive layer                               | $V_{oc}$<br>(mV) | $J_{sc}$<br>( $\mu A/cm^2$ ) | FF<br>(%) | $P_{max}$<br>( $\mu W/cm^2$ ) | ref |
|-------------------------------------------------|------------------|------------------------------|-----------|-------------------------------|-----|
| PBDB-T:IDIC                                     | 710              | 202.7                        | 65.0      | 94.1                          | [1] |
| PBDB-T:IDICO1                                   | 770              | 252.4                        | 66.0      | 102.1                         | [1] |
| PBDB-T:IDICO2                                   | 770              | 271.2                        | 63.0      | 141.4                         | [1] |
| PM6:Y6                                          | 720              | 454.2                        | 77.7      | 254.1                         | [2] |
| PM7:IT-4F                                       | 750              | 309.8                        | 72.6      | 168.7                         | [2] |
| PTB7-Th:IEICO-4F                                | 630              | 403.2                        | 69.8      | 177.3                         | [2] |
| PBDB-T:BTA3                                     | 1050             | 289.2                        | 52.4      | 159.1                         | [3] |
| PBDB-TF:BTA3                                    | 1140             | 180.4                        | 54.3      | 111.7                         | [3] |
| PBDB-TCI:BTA3                                   | 1180             | 138.2                        | 43.6      | 71.1                          | [3] |
| PDTBTBz-2F <sub>anti</sub> :PC <sub>71</sub> BM | 809              | 116.8                        | 70.2      | 66.3                          | [4] |
| P3HT:PC <sub>71</sub> BM                        | 486              | 71.8                         | 71.0      | 24.8                          | [4] |
| PBDB-T:PC <sub>71</sub> BM                      | 669              | 108.3                        | 71.0      | 51.4                          | [4] |
| PTB7:PC <sub>71</sub> BM                        | 576              | 171.4                        | 67.4      | 66.5                          | [4] |

*(1) Synthesis of 2-alkyl-3-chloro-thiophene (1a,1b)*

To a solution of 3-chlorothiophene (10 g, 84.7 mmol) in anhydrous THF (50 mL) at -78°C was added LDA (42.4 mL, 84.7 mmol, 2 M in THF) under nitrogen atmosphere. The mixture was stirred at -78°C for 2 hours, alkyl bromide (84.7 mmol) was added dropwise into the flask and then the mixture was elevated to the temperature slowly to room temperature overnight. The reaction mixture was poured into water and extracted with diethyl ether and then dried over anhydrous MgSO<sub>4</sub>. The crude product was obtained through vacuum distillation and used directly for next step without further purification.

*(2) Synthesis of 2-alkyl-3-chloro-thiophene-BDT (2a,2b)*

To a solution of 2-alkyl-3-chloro-thiophene (20 mmol) in anhydrous THF (150 mL) at -0°C was added LDA (10 mL, 20 mmol, 2 M in THF) under nitrogen atmosphere, After stirring for 2 hours, Benzo[1,2-b:4,5-b']dithiophene-4,8-dione (1.76 g, 8 mmol) was added into the flask and stirred at 60°C for 5 hours. After cooling to room temperature, a solution of SnCl<sub>2</sub>•2H<sub>2</sub>O (4.2 g, 20 mmol) in 10% HCl was added and stirred overnight. The mixture was poured into ice water and extracted with diethyl ether, the organic phase was dried over anhydrous MgSO<sub>4</sub> and removed solvent. The crude product was purified by silica gel chromatography using hexane as an eluent to afford the product as a yellow solid.

2a: EH-3Cl-BDT (3.0 g, yield 53%), <sup>1</sup>H NMR matched well with previous report<sup>[S1]</sup>.

2b: DMO-3Cl-BDT (3.2 g, yield 58%), <sup>1</sup>H NMR (300 MHz, CD<sub>2</sub>Cl<sub>2</sub>) δ 7.61 (d, J = 5.7 Hz, 2H), 7.52 (d, J = 5.7 Hz, 2H), 7.25 (s, 2H), 2.95 – 2.88 (m, 4H), 1.82 – 1.71 (m, 2H), 1.62 – 1.49 (m, 6H), 1.41 – 1.15 (m, 12H), 0.99 (d, J = 6.3 Hz, 6H), 0.89 (d, J = 6.6 Hz, 12H). <sup>13</sup>C NMR (125 MHz, CDCl<sub>3</sub>) δ 139.67, 139.16, 136.66, 135.72, 128.25, 128.16, 123.42, 123.19, 122.02, 39.43, 37.85, 37.13, 32.65, 28.13, 25.79, 24.85, 22.88, 22.80, 19.70. HRMS (EI, m/z): calcd. for C<sub>38</sub>H<sub>48</sub>Cl<sub>2</sub>S<sub>4</sub>, 702.2016, found, 702.

*(3) Synthesis of 2-alkyl-3-chloro-thiophene-BDT-Sn (3a,3b)*

To a solution of 2-alkyl-3-chloro-thiophene-BDT (10 mmol) in anhydrous THF (50 mL) at -78°C was added LDA (12.5 mL, 25 mmol, 2 M in THF) under nitrogen atmosphere, after stirring for 3 hours, trimethyltin chloride solution (25 ml, 25 mmol, 1M in THF) was added into the flask and stirred at 25°C overnight. The mixture was poured into water and extracted with diethyl ether, the organic phase was dried over anhydrous MgSO<sub>4</sub> and removed solvent. The crude product was purified by recrystallization from methanol to afford product as yellow solid.

3a: EH-3Cl-BDT-Sn (3.3 g, yield 55%), <sup>1</sup>H NMR matched well with previous report. <sup>[S1]</sup>

3b: DMO-3Cl-BDT-Sn (3.4 g, yield 54%), <sup>1</sup>H NMR (300 MHz, CD<sub>2</sub>Cl<sub>2</sub>) δ 7.65 (s, 2H), 7.25 (s, 2H), 2.93 (m, 4H), 1.78 (m, 2H), 1.66 – 1.49 (m, 6H), 1.42 – 1.13 (m, 12H), 1.00 (d, J = 6.3

Hz, 6H), 0.88 (d, J = 6.6 Hz, 12H), 0.42 (s, 18H). <sup>13</sup>C NMR (125 MHz, CDCl<sub>3</sub>) δ 143.48, 143.36, 139.30, 137.47, 136.48, 130.75, 128.05, 121.87, 121.70, 39.45, 37.82, 37.15, 32.70, 28.12, 25.82, 24.86, 22.88, 22.80, 19.70, -8.11. HRMS (EI, m/z): calcd. for C<sub>44</sub>H<sub>64</sub>Cl<sub>2</sub>S<sub>4</sub>Sn<sub>2</sub>, 1030.1312, found, 1030.

#### (4) Synthesis of 2-alkyl-4-chloro-thiophene (1d,1e)

To a solution of (3-chlorothiophen-2-yl)trimethylsilane (16 g, 84.7 mmol) in anhydrous THF (50 mL) at -78°C was added LDA (42.4 mL, 84.7 mmol, 2 M in THF) under nitrogen atmosphere. The mixture was stirred at -78°C for 2 hours, alkyl bromide (84.7mmol) was added dropwise into the flask and then the mixture was elevated to the temperature slowly to room temperature overnight. The reaction mixture was poured into water and extracted with diethyl ether and then dried over anhydrous MgSO<sub>4</sub>. The crude product was obtained through vacuum distillation and used directly for the next step without further purification.

#### (5) Synthesis of 2-alkyl-4-chloro-thiophene-BDT (2d,2e)

To a solution of 2-alkyl-4-chloro-thiophene (20 mmol) in anhydrous THF (150 mL) at -0°C was added LDA (10 mL, 20 mmol, 2 M in THF) under nitrogen atmosphere, After stirring for 2 hours, Benzo[1,2-b:4,5-b']dithiophene-4,8-dione (1.76 g, 8 mmol) was added into the flask and stirred at 60 °C for 5 hours. After cooling to room temperature, a solution of SnCl<sub>2</sub>•2H<sub>2</sub>O (4.2 g, 20 mmol) in 10% HCl was added and stirred overnight. The mixture was poured into ice water and extracted with diethyl ether, the organic phase was dried over anhydrous MgSO<sub>4</sub> and removed solvent. The crude product was purified by silica gel chromatography using hexane as an eluent to afford the product as a yellow solid.

2d: EH-4Cl-BDT (3.1 g, yield 60%), <sup>1</sup>H NMR (300 MHz, CD<sub>2</sub>Cl<sub>2</sub>) δ 7.60 (d, J = 5.7 Hz, 2H), 7.53 (d, J = 5.7 Hz, 2H), 7.24 (d, J = 1.6 Hz, 2H), 2.85 (d, J = 7.0 Hz, 4H), 1.76 (q, J = 6.2 Hz, 2H), 1.51 – 1.27 (m, 16H), 0.95 (m, 12H). <sup>13</sup>C NMR (125 MHz, CDCl<sub>3</sub>) δ 139.16, 138.48, 136.65, 136.04, 128.19, 128.15, 123.42, 123.17, 122.86, 41.07, 32.66, 32.21, 28.97, 25.97, 23.15, 14.27, 11.01. HRMS (EI, m/z): calcd. for C<sub>34</sub>H<sub>40</sub>Cl<sub>2</sub>S<sub>4</sub>, 646.1390, found, 646.

2e: DMO-4Cl-BDT (3.5 g, yield 66%) <sup>1</sup>H NMR (300 MHz, CD<sub>2</sub>Cl<sub>2</sub>) δ 7.61 (d, J = 5.7 Hz, 2H), 7.54 (d, J = 5.7 Hz, 2H), 7.25 (s, 2H), 2.98 – 2.85 (m, 4H), 1.78 (m, 2H), 1.65 – 1.49 (m, 6H), 1.44 – 1.13 (m, 12H), 0.99 (d, J = 6.3 Hz, 6H), 0.88 (d, J = 6.6 Hz, 12H). <sup>13</sup>C NMR (300 MHz, CDCl<sub>3</sub>) δ 139.69, 139.18, 136.68, 135.74, 128.27, 128.18, 123.44, 123.21, 122.04, 39.45, 37.87, 37.15, 32.67, 28.15, 25.81, 24.87, 22.90, 22.82, 19.72. HRMS (EI, m/z): calcd. for C<sub>38</sub>H<sub>48</sub>Cl<sub>2</sub>S<sub>4</sub>, 702.2016, found, 702.

#### (6) Synthesis of 2-alkyl-4-chloro-thiophene-BDT-Sn (3d,3e)

To a solution of 2-alkyl-4-chloro-thiophene-BDT (5 mmol) in anhydrous THF (50 mL) at -78°C was added LDA (6 mL, 12 mmol, 2 M in THF) under nitrogen atmosphere after stirring for 3 hours, trimethyltin chloride solution (15 mL, 15 mmol, 1M in THF) was added into the flask and stirred at 25°C overnight. The mixture was poured into water and extracted with diethyl ether, the organic phase was dried over anhydrous MgSO<sub>4</sub> and removed solvent. The crude product was purified by recrystallization from methanol to afford product as yellow solid.

3d: EH-4Cl-BDT-Sn (2.4 g, 50%), <sup>1</sup>H NMR (300 MHz, CD<sub>2</sub>Cl<sub>2</sub>) δ 7.66 (s, 2H), 7.26 (s, 2H), 2.86 (d, J = 7.0 Hz, 4H), 1.75 (m, 2H), 1.51 – 1.27 (m, 16H), 0.99 – 0.83 (m, 12H), 0.41 (s, 18H). <sup>13</sup>C NMR (125 MHz, CDCl<sub>3</sub>) δ 143.48, 143.37, 138.10, 137.44, 136.80, 130.74, 127.90, 122.68, 121.68, 41.01, 32.67, 32.27, 28.99, 26.05, 23.18, 14.30, 11.07, -8.16. HRMS (EI, m/z): calcd. for C<sub>40</sub>H<sub>56</sub>Cl<sub>2</sub>S<sub>4</sub>Sn<sub>2</sub>, 974.0686, found, 974.

3e: DMO-4Cl-BDT-Sn (2.8 g, 62%), <sup>1</sup>H NMR (300 MHz, CD<sub>2</sub>Cl<sub>2</sub>) δ 7.65 (s, 2H), 7.26 (s, 2H), 3.11 – 2.73 (m, 4H), 1.80 (m, 2H), 1.66 – 1.47 (m, 6H), 1.46 – 1.12 (m, 12H), 1.00 (d, J = 6.3 Hz, 6H), 0.88 (d, J = 6.6 Hz, 12H), 0.42 (s, 18H). <sup>13</sup>C NMR (125 MHz, CDCl<sub>3</sub>) δ 143.36, 139.30, 137.46, 136.48, 130.75, 128.04, 121.88, 121.70, 39.45, 37.82, 37.15, 32.69, 28.12, 25.82, 24.86, 22.89, 22.80, 19.70, -8.10.

HRMS (EI, m/z): calcd. for C<sub>44</sub>H<sub>64</sub>Cl<sub>2</sub>S<sub>4</sub>Sn<sub>2</sub>, 1030.1312, found, 1030.

#### (7) Synthesis of PBDB-EH-3Cl and PBDB-DMO-3Cl.

2-alkyl-3-chloro-thiophene-BDT-Sn (0.1 mmol), 1,3-bis(5-bromothiophen-2-yl)-5,7-bis(2-ethylhexyl)-4H,8H-benzo[1,2-c:4,5-c']dithiophene-4,8-dione (77 mg, 0.1 mmol), and Pd(pph<sub>3</sub>)<sub>4</sub> (5.8 mg, 0.005 mmol) were combined in a 10 mL two-necked flask. Anhydrous toluene (5 mL) was added under the argon atmosphere. The mixture was reacted 24 hrs at 110 °C after cooled down, then the reactant mixture was poured into methanol (200 mL) for precipitation. The precipitate was filtered and Soxhlet extracted with methanol, hexane, and chloroform. The ingredient extracted from chloroform was concentrated, precipitated into 200 mL methanol, filtered, and dried under vacuum to give the dark solid.

PBDB-EH-3Cl (80 mg, 67%). (M<sub>n</sub> = 27 KDa, PDI = 1.9)

PBDB-DMO-3Cl (90 mg, 70%). (M<sub>n</sub> = 32 KDa, PDI = 2.3)

<sup>1</sup>H NMR (300 MHz, CDCl<sub>3</sub>): δ (ppm) 7.70 – 6.68 (broad, 8H), 3.15 – 2.70 (broad, 8H), 1.91 – 0.45 (broad, 68H).

#### (8) Synthesis of PBDB-EH-4Cl, and PBDB-DMO-4Cl.

2-alkyl-4-chloro-thiophene-BDT-Sn (0.1 mmol), 1,3-bis(5-bromothiophen-2-yl)-5,7-bis(2-ethylhexyl)-4H,8H-benzo[1,2-c:4,5-c']dithiophene-4,8-dione (77 mg, 0.1 mmol), and Pd(pph<sub>3</sub>)<sub>4</sub> (5.8 mg, 0.005 mmol) were combined in a 10 mL two-necked flask. Anhydrous toluene (5 mL)

was added under the argon atmosphere. The mixture was reacted 24 hrs at 110 °C after cooled down, then the reactant mixture was poured into methanol (200 mL) for precipitation. The precipitate was filtered and Soxhlet extracted with methanol, hexane, and chloroform. The ingredient extracted from chloroform was concentrated, precipitated into 200 mL methanol, filtered, and dried under vacuum to give the dark solid.

PBDB-EH-4Cl (90 mg, 71%). ( $M_n$ = 20 KDa, PDI= 2.2)

$^1\text{H}$  NMR (300 MHz,  $\text{CDCl}_3$ ):  $\delta$  (ppm) 7.67 – 6.80 (broad, 8H), 3.06 – 2.68(broad, 8H), 1.91–0.45 (broad, 60H).

PBDB-DMO-4Cl (93 mg, 71%). ( $M_n$ = 30 KDa, PDI= 2.2)

$^1\text{H}$  NMR (300 MHz,  $\text{CDCl}_3$ ):  $\delta$  (ppm) 7.70 – 6.68 (broad, 8H), 3.15 – 2.72(broad, 8H), 1.90–0.46 (broad, 68H).

## References

- [S0] Zhang, S., Qin, Y., Zhu, J. and Hou, J., 2018. Over 14% efficiency in polymer solar cells enabled by a chlorinated polymer donor. *Advanced Materials*, 30(20), p.1800868.
- [1] H. S. Ryu, H. G. Lee, S. C. Shin, J. Park, S. H. Kim, E. J. Kim, T. J. Shin, J. W. Shim, B. J. Kim, H. Y. Woo, *J. Mater. Chem. A* **2020**, 8, 23894.
- [2] Z. Chen, H. Yin, Z. Wen, S. K. So, X. Hao, *Sci. Bull.* **2021**, 66, 1648.
- [3] Z. Chen, T. Wang, Z. Wen, P. Lu, W. Qin, H. Yin, X. T. Hao, *ACS Energy Lett.* **2021**, 6, 3203.
- [4] Y. J. You, C. E. Song, Q. V. Hoang, Y. Kang, J. S. Goo, D. H. Ko, J. J. Lee, W. S. Shin, J. W. Shim, *Adv. Funct. Mater.* **2019**, 29, 1.
